# Supplementary material for: miR-146a improves hepatic lipid and glucose metabolism by targeting MED1
Source: PubMed Central journal article supplement — Int J Mol Med. 2019 Dec 27;45(2):543–55. doi: 10.3892/ijmm.2019.4443 (PMC6984781; doi:10.3892/ijmm.2019.4443), 2019-12-27
Supplement: Supplementary_Data.pdf [file Supplementary_Data.pdf]

Table SI. Primer sequences for qPCR.

| Gene name        | Primer sequence           | Gene name          | Primer sequence                |
|------------------|---------------------------|--------------------|--------------------------------|
| <i>MED1-F</i>    | CATTTCTTCAGATCCGACGGC     | <i>Nrf1-R</i>      | TATGCTCGGTGTAAGTAGCCA          |
| <i>MED1-R</i>    | ATTGCCAATCAGGGCCACAT      | <i>Nrf2-F</i>      | TCTGCCAACTACTCCCAGGT           |
| <i>CD36-F</i>    | TGCAGCCTCATTTCCACCTT      | <i>Nrf2-R</i>      | AGTGACTGAAACGTAGCCGA           |
| <i>CD36-R</i>    | TCAACTGGAGAGGCAAAGGC      | <i>Tfam-F</i>      | ATGGCGTTTTCTCCGAAGCAT          |
| <i>SREBP1c-F</i> | CTGACCCGACATCGAAGGTGA     | <i>Tfam-R</i>      | TCCGCCCTATAAGCATCTTGA          |
| <i>SREBP1c-R</i> | CCAGCATAGGGTGGGTCAAA      | <i>Tfb1m-F</i>     | GTTGCCACGATTCGAGAAAT           |
| <i>Acc1-F</i>    | GAGGACTGGGAGGATGGGG       | <i>Tfb1m-R</i>     | GCCCACTTCGTAAACATAAGCAT        |
| <i>Acc1-R</i>    | GTTATCCCCAAACCCAGGCA      | <i>GAPDH-F</i>     | GGAGCGAGATCCCTCCAAAAT          |
| <i>Fasn-F</i>    | TCTGGTTCTTACGTCTGTTGC     | <i>GAPDH-R</i>     | GGCTGTTGTCATACTTCTCATGG        |
| <i>Fasn-R</i>    | CTGTGCAGTCCCTAGCTTTCC     | <i>miR-146a-F</i>  | ACACTCCAGCTGGGTGAGAACTGAATTCCA |
| <i>Scd1-F</i>    | GCGATACACTCTGGTGCTCA      | <i>U6-F</i>        | ACACTCCAGCTGGGATTCGTGAAGCG     |
| <i>Scd1-R</i>    | CCCAGGGAAACCAGGATATT      | <i>Universal-R</i> | CTCAACTGGTGTCGTGGAGTCGG        |
| <i>ApoA1-F</i>   | GGCACGTATGGCAGCAAGAT      | <i>mtDNA-F</i>     | CACCCAAGAACAGGGTTTTGT          |
| <i>ApoA1-R</i>   | CCAAGGAGGAGGATTCAAACCTG   | <i>mtDNA-R</i>     | TGGCCATGGGTATGTTGTAA           |
| <i>ApoB-F</i>    | CGTGGGCTCCAGCATTCTA       | <i>18S-F</i>       | TAGAGGGACAAGTGGCGTTC           |
| <i>ApoB-R</i>    | TCACCAGTCATTTCTGCCTTTG    | <i>18S-R</i>       | CGCTGAGCCAGTCAGTGT             |
| <i>Mttp-F</i>    | CTCTTGGCAGTGCTTTTTCTCT    | <i>Polrmt-F</i>    | TGGGCGCAAAGCTAGAGG             |
| <i>Mttp-R</i>    | GAGCTTGTATAGCCGCTCATT     | <i>Polrmt-R</i>    | GTGAAGGGTCCAGAACTCCTG          |
| <i>Fabp-F</i>    | ATGAACTTCTCCGGCAAGTACC    | <i>Ndufs3-F</i>    | ATGAGGTAAAGCGGGTAGTGCC         |
| <i>Fabp-R</i>    | GGTCCTCGGGCAGACCTAT       | <i>Ndufs3-R</i>    | GGTTTCAGGCTTCTTGTCTCC          |
| <i>Acaa2-F</i>   | GATCTCAAGCTGGAAGATAC      | <i>Sdhb-F</i>      | ATGAACATCAACGGAGGCAATA         |
| <i>Acaa2-R</i>   | ACCTCTGCTGAGACTGCAAG      | <i>Sdhb-R</i>      | CTGGGACTCATCCTTCTTCTTCA        |
| <i>PPARα-F</i>   | AAGAGCTTGGAGCTCGGC        | <i>Sdhc-F</i>      | GCTTTCCGCTGCTTTCTGCT           |
| <i>PPARα-R</i>   | AGCTTCCAGAACTATCCTCGC     | <i>Sdhc-R</i>      | CCCTCTTAGCTGAGCAGGACAAT        |
| <i>Cpt1a-F</i>   | GTTTCTGGCTCGTTGGATGC      | <i>Cox5b-F</i>     | AGAAGGGACTGGACCCATACAA         |
| <i>Cpt1a-R</i>   | CGGAGTGACCGTGAAGTAA       | <i>Cox5b-R</i>     | GTGCAGCCAAAACCAGATGA           |
| <i>Mcad-F</i>    | CAAGTTTGCCAGAGAGGAGATTATC | <i>ND4L-F</i>      | TCGCTCACACCTCATATCCT           |
| <i>Mcad-R</i>    | AACGGGTACTCCCCGCTTT       | <i>ND4L-R</i>      | GGCCATATGTGTTGGAGATTG          |
| <i>Hadha-F</i>   | TGCTCCTCGACCACGCTAAC      | <i>CYTB-F</i>      | CAATGGCGCCTCAATATTCT           |
| <i>Hadha-R</i>   | GCCTTGGTCTTTTTCTGCTT      | <i>CYTB-R</i>      | AATGTATGGGATGGCGGATA           |
| <i>Acadl-F</i>   | TCTTTTCTCGGAGCATGACA      | <i>ND1-F</i>       | CCCTAAAACCCGCCACATCT           |
| <i>Acadl-R</i>   | GACCTCTTACTCACTTCTCCAG    | <i>ND1-R</i>       | GAGCGATGGTGAGAGCTAAGGT         |
| <i>18S-F</i>     | TCTCTACTTGGATAACTGTGG     | <i>CO2-F</i>       | CCGACTACGGCGGACTAATC           |
| <i>18S-R</i>     | GGCGACTACCATCGAAAGTTG     | <i>CO2-R</i>       | CGCCTGGTTCTAGGAATAATGG         |
| <i>Nrf1-F</i>    | AGGAACACGGAGTGACCCAA      | <i>12S-F</i>       | CATCAAGCACGCAGCAATGCAG         |
|                  |                           | <i>12S-R</i>       | GTTAATCACTGCTGTTTTCCCGTG       |
